# Supplementary material
Source: publisher figshare collection journal article supplement (https://gsajournals.figshare.com/ndownloader/files/27046427)
Supplement: Supplementary file 1 [file 27046427]

| **TABLE S3** | **PCR AND SEQUENCING STRATEGIES** |
| --- | --- |
|  |  |
| This table lists PCR and sequencing primers used to amplify and sequence Ku70 and Nuku from aforementioned primate samples. | |
| (PCR primer), *sequencing primer | |
|  |  |
|  |  |
| **Ku70** |  |
| **ORGANISM** | **PRIMERS** |
| Gorilla PR00280 | (Ai009/Ai016) Ai009*, Ai013*, Ai019*, Ai018*, Ai037*, Ai021*, Ai015*, Ai022a* |
| Borneo Orangutan PR00650 | (Ai009/Ai016) Ai009*, Ai016*, Ai013*, Ai019*, Ai018*, Ai037*, Ai021*, Ai015*, Ai022a* |
| Siamang PR00722 | (Ai009/Ai016) Ai009*, Ai013*, Ai019*, Ai018*, Ai021*, Ai015*, Ai022a* |
| White-Cheeked Gibbon PR01037 | (Ai009/Ai016) Ai009*, Ai013*, Ai019*, Ai018*, Ai037*, Ai021*, Ai015*, Ai022a* |
| Agile Gibbon PR00773 | (Ai009/Ai016) Ai009*, Ai013*, Ai019*, Ai018*, Ai037*, Ai015*, Ai022a* |
| Rhesus Mm265-95 | (Ai009/Ai016) Ai013*, Ai019*, Ai018*, Ai021*, Ai037*, Ai015*, Ai022a* |
| Talapoin PR00716 | (Ai009/Ai016) Ai009*, Ai013*, Ai019*, Ai018*, Ai015*, Ai022a*, Ai037* |
| Colobus PR00980 | (Ai009/Ai016) Ai009*, Ai013*, Ai019*, Ai018*, Ai015*, Ai022a* |
| Leaf Monkey PR01099 | (Ai009/Ai016) Ai009*, Ai013*, Ai018*, Ai015* |
| Crab-eating Macaque Mf103-06 | (Ai009/Ai016) Ai009*, Ai013*, Ai019*, Ai018*, Ai037*, Ai015* |
| Olive Baboon PR00978 | (Ai009/Ai016) Ai009*, Ai016*, Ai014*, Ai013*, Ai019*, Ai037*, Ai021*, Ai022a* |
| Black Mangabey PR01215 | (Ai009/Ai016) Ai004*, Ai013*, Ai015*, Ai019*, Ai037*, Ai022a* |
| Wolf's Guenon PR01241 | (Ai009/Ai016) Ai013*, Ai019*, Ai009*, Ai018*, Ai037*, Ai015*, Ai021*, Ai022a* |
|  |  |
| **Nuku2** |  |
| **ORGANISM** | **PRIMERS** |
| Gorilla PR00280 | (Ai023/Ai028) Ai038*, Ai023*, Ai054,* Ai024*, Ai025*, Ai028* |
| Borneo Orangutan PR00650 | (Ai023/Ai028) Ai038*, Ai023*, Ai054,* Ai024*, Ai025*, Ai028* |
| Siamang PR00722 | (Ai022b/Ai030) Ai038*, Ai023*, Ai054,* Ai024*, Ai025* |
| White-Cheeked Gibbon PR01037 | (Ai023/Ai028) Ai038*, Ai023*, Ai054*, Ai053*, Ai025*, Ai055* |
| Agile Gibbon PR00773 | (Ai023/Ai028) Ai038*, Ai023*, Ai054*, Ai024*, Ai053*, Ai055*, Ai025* |
| Talapoin PR00716 | (Ai023/Ai028) Ai038*, Ai023*, Ai024*, Ai028*, Ai025* |
| Colobus PR00980 | (Ai023/Ai028) Ai038*, Ai023*, Ai024*, Ai026*, Ai028*, Ai025* |
| Leaf Monkey PR01099 | (Ai023/Ai028) Ai038*, Ai023*, Ai024*, Ai028*, Ai025* |
| Crab-eating Macaque Mf103-06 | (Ai023/Ai028) Ai038*, Ai023*, Ai024*, Ai028*, Ai025* |
| Olive Baboon PR00978 | (Ai023/Ai028) Ai038*, Ai023*, Ai054*, Ai024*, Ai055*, Ai025*, Ai028* |
| Black Mangabey PR01215 | (Ai023/Ai028) Ai038*, Ai023*, Ai054*, Ai024*, Ai055*, Ai025*, Ai028* |
| Wolf's Guenon PR01241 | (Ai023/Ai028) Ai038*, Ai023* Ai054*, Ai024*, Ai055*, Ai025*, Ai028* |
